# Supplementary material for: Catalytic mechanism of the tyrosinase reaction toward the Tyr98 residue in the caddie protein
Source: PLoS Biol. 2018 Dec 31;16(12):e3000077. doi: 10.1371/journal.pbio.3000077 (PMC6312201; doi:10.1371/journal.pbio.3000077)
Supplement: S1 Table — (XLSX) [file pbio.3000077.s003.xlsx]

## Sheet: Sheet1
Equivalent B-factorsa
	ST1	ST2	ST3	ST4	ST5	ST6
CuA-1	12.24	13.61	11.65	14.9	11.35	-
CuA-2	-	18	14.17	13.83	10.11	-
CuA-3	-	-	14.24	14.01	10.32	42.06
CuB-1	11.15	13.44	11.56	11.34	9.81	19.04
CuB-2	-	12.39	11.89	11.86	9.28	16.09
His38A Nε	10.62	13.87	12.74	13.78	9.75	-
His38B Nε	-	-	13.19	14.34	9.45	19.25
His54A Nε	10.52	14.69	13.66	16.27	11.2	-
His54B Nε	-	-	13.85	15.63	10.68	37.21
His63 Nε	9.06	11.11	10.1	12.1	10.7	-
His190 Nε	8.9	10.56	9.33	11.14	8.36	15
His194 Nε	7.89	9.95	8.69	10.79	9.22	13.95
His216 Nε	9.13	10.69	10.59	10.51	9.38	14.49
Tyr98 Oη	14.02	-	15.62	16.08	12.13	15.71
Tyr98 Oζ2	-	-	11.65	14.3	12.77	16.65
Peroxide O1	-	11.88	14.46	13.36	10.31	-
Peroxide O2	-	12.59	14.5	14.1	11.12	-
Wat3	10.93	12.81	14.68	13.68	11.16	27.25
aUnits are in Å2.
